# Supplementary material
Source: PubMed Central journal article supplement (PMC6540094)
Supplement: NIHMS1030935-supplement-SI_file.pdf [file NIHMS1030935-supplement-SI_file.pdf]

## Supporting Information

### Probing Distal Regions of the A<sub>2B</sub> Adenosine Receptor by Quantitative Structure - Activity Relationship Modeling of Known and Novel Agonists

Andrei A. Ivanov, Ben Wang, Athena M. Klutz, Vincent L. Chen, Zhan-Guo Gao, and Kenneth A. Jacobson

#### Contents:

1. **Table S1.** The statistical parameters of individual CoMFA and CoMSIA models derived with the only one particular type of the field.
2. **Table S2.** The data set of the A<sub>2B</sub> adenosine receptor agonists used for the molecular docking studies and QSAR-modeling
3. **Figure S1.** Pharmacological data at the human A<sub>2B</sub> AR.
4. **Figure S2.** HPLC traces for analysis of nucleoside derivatives 7 – 10.

**Table S1.**

|                | CoMFA fields |               | CoMSIA fields |                 |        |               |             |
|----------------|--------------|---------------|---------------|-----------------|--------|---------------|-------------|
|                | Steric       | Electrostatic | H-bond donor  | H-bond acceptor | Steric | Electrostatic | Hydrophobic |
| R <sup>2</sup> | 0.908        | 0.450         | 0.901         | 0.800           | 0.829  | 0.764         | 0.852       |
| Q <sup>2</sup> | 0.581        | 0.395         | 0.504         | 0.558           | 0.575  | 0.538         | 0.682       |
| SEE            | 0.262        | 0.613         | 0.283         | 0.385           | 0.356  | 0.414         | 0.324       |
| C              | 5            | 1             | 9             | 5               | 5      | 4             | 3           |
| F              | 94           | 43            | 44            | 38              | 46     | 40            | 96          |

Lattice space of 1Å, attenuation factor,  $\alpha = 0.5$ , and MNDO atomic charges were used.

SEE – standard error of estimation. C – PLS components.

**Table S2.**

| # | Structure                                                                                        | pEC <sub>50</sub>                                                                                                 | RP, exp | RP, pred | ΔRP    |
|---|--------------------------------------------------------------------------------------------------|-------------------------------------------------------------------------------------------------------------------|---------|----------|--------|
| 1 | 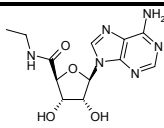<br>NECA        | -2.146 <sup>1</sup><br>-3.491 <sup>2</sup><br>-3.380 <sup>3,4</sup><br>-2.204 <sup>5</sup><br>-2.190 <sup>6</sup> | 0.000   | 0.125    | -0.125 |
| 2 | <br>(S)-PHPNECA | -2.342                                                                                                            | 1.038   | 0.904    | 0.134  |
| 3 | <br>CPA         | -4.279                                                                                                            | -1.816  | -1.704   | -0.112 |
| 4 | <br>MRS3997    | -2.107                                                                                                            | 0.039   | 0.056    | -0.017 |
| 5 | <br>MRS5098   | -1.914                                                                                                            | 0.290   | 0.171    | 0.119  |
| 6 |               | -0.863                                                                                                            | 1.327   | 1.008    | 0.319  |
| 7 | <br>MRS5098   | -2.241                                                                                                            | -0.094  | -0.500   | 0.406  |

| #   | Structure                                                                                               | pEC <sub>50</sub> | RP, exp | RP, pred | ΔRP    |
|-----|---------------------------------------------------------------------------------------------------------|-------------------|---------|----------|--------|
| 8   | 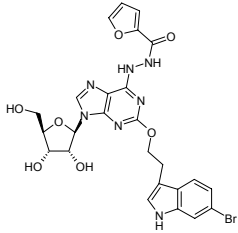<br>MRS5101            | -2.461            | -0.315  | -0.083   | -1.161 |
| 9   | <br>MRS5099            | -2.155            | 0.009   | 0.802    | 0.793  |
| 10  | <br>MRS5100           | -2.985            | -0.838  | -0.422   | -0.416 |
| 11* | <br>R-PIA            | -3.225            | -1.079  | -0.681   | -0.398 |
| 12  | <br>6-guanidino_NECA | -1.736            | 0.410   | 0.129    | 0.281  |
| 13  | <br>6-guanidino_NECA | -3.543            | -1.397  | -1.240   | -0.157 |

| #   | Structure                                                                           | pEC <sub>50</sub> | RP, exp | RP, pred | ΔRP    |
|-----|-------------------------------------------------------------------------------------|-------------------|---------|----------|--------|
| 14* | 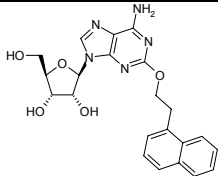   | -3.158            | -1.012  | -0.690   | -0.322 |
| 15  |    | -3.250            | -1.104  | -1.158   | 0.054  |
| 16  |    | -2.476            | -0.330  | -0.399   | 0.069  |
| 17  |    | -3.412            | -1.266  | -1.238   | -0.028 |
| 18* |   | -2.885            | -0.739  | -0.807   | 0.068  |
| 19* |  | -3.339            | -1.192  | -0.868   | -0.324 |
| 20  |  | -2.562            | -0.416  | -0.876   | 0.460  |
| 21  |  | -3.272            | -1.126  | -0.919   | -0.207 |

| #   | Structure                                                                                             | pEC <sub>50</sub> | RP, exp | RP, pred | ΔRP    |
|-----|-------------------------------------------------------------------------------------------------------|-------------------|---------|----------|--------|
| 22  | 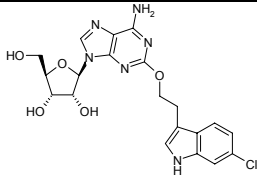                     | -2.335            | -0.188  | -0.166   | -0.022 |
| 23* |                      | -3.097            | -0.951  | -0.711   | -0.240 |
| 24  |                      | -2.952            | -0.806  | -0.773   | -0.033 |
| 25  |                      | -3.515            | -1.368  | -1.232   | -0.136 |
| 26  |                    | -2.995            | -0.849  | -0.951   | 0.102  |
| 27* |                    | -3.491            | -0.233  | 0.129    | -0.362 |
| 28* | <b>NCPA</b><br>    | -3.724            | -0.889  | -1.016   | 0.127  |
| 29* | <b>2Cl-Ado</b><br> | -4.380            | -0.787  | -0.216   | -0.571 |
| 30  |                    | -5.308            | -1.308  | -1.298   | -0.010 |

| #   | Structure                                                                                                 | pEC <sub>50</sub> | RP, exp | RP, pred | ΔRP    |
|-----|-----------------------------------------------------------------------------------------------------------|-------------------|---------|----------|--------|
| 31  | 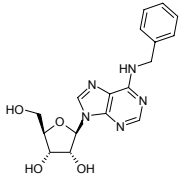                         | -4.799            | -1.491  | -1.596   | 0.105  |
| 32  |                          | -4.982            | -1.225  | -1.285   | 0.060  |
| 33  | <b>SPA</b><br>           | -3.792            | -0.412  | -0.461   | 0.049  |
| 34  | <b>(R)-PHPAdo</b><br>   | -2.964            | 0.416   | 0.507    | -0.091 |
| 35  | <b>(S)-PHPAdo</b><br>  | -3.959            | -0.579  | -0.676   | 0.097  |
| 36* |                        | -2.863            | 0.517   | 0.354    | 0.163  |
| 37  |                        | -3.380            | 0.000   | 0.131    | -0.131 |
| 38  | <b>(R)-PHPNECA</b><br> | -5.000            | -1.620  | -1.482   | -0.138 |
|     | <b>HEADO</b>                                                                                              |                   |         |          |        |

| #   | Structure                                                                                            | pEC <sub>50</sub> | RP, exp | RP, pred | ΔRP    |
|-----|------------------------------------------------------------------------------------------------------|-------------------|---------|----------|--------|
| 39* | 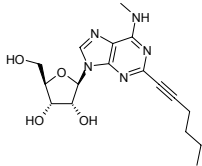                    | -5.000            | -1.620  | -2.036   | 0.416  |
| 40  |                     | -5.000            | -1.620  | -1.846   | 0.226  |
| 41  |                     | -5.000            | -1.620  | -1.680   | 0.060  |
| 42  |                    | -5.000            | -1.620  | -1.588   | -0.032 |
| 43  |                   | -5.000            | -1.620  | -1.078   | -0.542 |
| 44  |                   | -3.949            | -0.569  | -0.890   | 0.321  |
| 45  |                   | -3.785            | -0.405  | -0.385   | -0.020 |
| 46  | <b>HENECA</b><br> | -3.415            | -0.035  | -0.031   | -0.004 |

| #   | Structure                                                                           | pEC <sub>50</sub> | RP, exp | RP, pred | ΔRP    |
|-----|-------------------------------------------------------------------------------------|-------------------|---------|----------|--------|
| 47  | 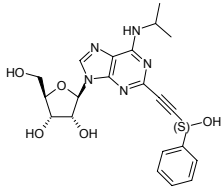   | -2.982            | 0.398   | 0.419    | -0.021 |
| 48  |    | -2.567            | -0.363  | -0.082   | -0.281 |
| 49* |    | -2.356            | -0.152  | -0.033   | -0.119 |
| 50  |   | -2.436            | -0.232  | -0.185   | -0.047 |
| 51  |  | -2.322            | -0.118  | -0.120   | 0.002  |
| 52  |  | -2.243            | -0.039  | -0.066   | 0.027  |
| 53* |  | -2.780            | -0.576  | -0.059   | -0.517 |
| 54  |  | -2.653            | -0.449  | -0.451   | 0.002  |



| #   | Structure                                                                           | pEC <sub>50</sub> | RP, exp | RP, pred | ΔRP    |
|-----|-------------------------------------------------------------------------------------|-------------------|---------|----------|--------|
| 55  | 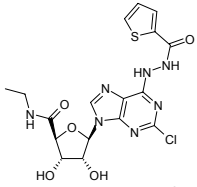   | -2.301            | -0.097  | -0.166   | 0.069  |
| 56  |    | -2.532            | -0.327  | -0.313   | -0.014 |
| 57* |    | -2.555            | -0.351  | -0.658   | 0.307  |
| 58  |   | -1.182            | 1.009   | 1.085    | -0.076 |
| 59* |  | -1.090            | 1.100   | 0.966    | 0.134  |
| 60  |  | -1.021            | 1.169   | 1.245    | -0.076 |
| 61  |  | -1.480            | 0.710   | 0.756    | -0.046 |

| #   | Structure                                                                           | pEC <sub>50</sub> | RP, exp | RP, pred | ΔRP    |
|-----|-------------------------------------------------------------------------------------|-------------------|---------|----------|--------|
| 62  | 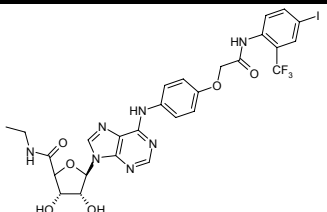   | -2.029            | 0.161   | 0.157    | 0.004  |
| 63* |    | -1.511            | 0.680   | 0.531    | 0.149  |
| 64  |    | -1.657            | 0.533   | 0.373    | 0.160  |
| 65  |   | -1.729            | 0.461   | 0.462    | -0.001 |
| 66  |  | -1.550            | 0.640   | 0.719    | -0.079 |
| 67* |  | -1.215            | 0.976   | 0.246    | 0.730  |
| 68  |  | -2.477            | -0.287  | -0.410   | 0.123  |

| #   | Structure                                                                           | pEC <sub>50</sub> | RP, exp | RP, pred | ΔRP    |
|-----|-------------------------------------------------------------------------------------|-------------------|---------|----------|--------|
| 69  | 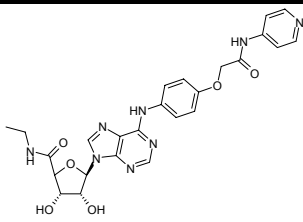   | -1.509            | 0.681   | 0.725    | -0.044 |
| 70  |    | -2.176            | 0.014   | -0.020   | 0.034  |
| 71* |    | -2.380            | -0.190  | 0.111    | -0.301 |
| 72  |   | -2.498            | -0.308  | -0.134   | -0.174 |
| 73  |  | -1.629            | 0.561   | 0.614    | -0.053 |
| 74  |  | -2.556            | -0.366  | -0.026   | -0.340 |

| #   | Structure                                                                         | pEC <sub>50</sub> | RP, exp | RP, pred | ΔRP   |
|-----|-----------------------------------------------------------------------------------|-------------------|---------|----------|-------|
| 75* | 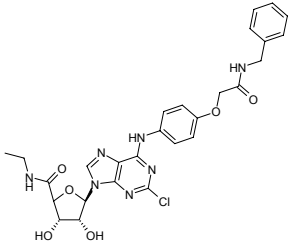 | -2.243            | -0.053  | -0.387   | 0.334 |
| 76  |  | -2.480            | -0.290  | -0.470   | 0.180 |

The values of pEC<sub>50</sub> were calculated from experimental values of EC<sub>50</sub>: compounds **4**, **11** – **26** – ref. 1; **3**, **27** – **32** – ref. 2; **2**, **33** – **47** – refs3 and 4; **5**, **48** – **57** – ref 5; **6**, **58** – **76** – ref 6; compounds **7** – **10** were proposed in this study. RP – NECA related potency,  $RP = pEC_{50}(\text{comp})_i - pEC_{50}(\text{NECA})_i$ , where *i* represents the same reference number. The RP values were calculated with the final CoMFA/CoMSIA **Model 3**. \* – compounds included to the test set, all other compounds with exception of **7** – **10** were included to the training set.  $\Delta RP = RP_{\text{exp}} - RP_{\text{pred}}$ .

**Figure S1.** Pharmacological Data: cAMP Responses in A<sub>2B</sub> AR-expressing CHO Cells.<sup>a</sup>

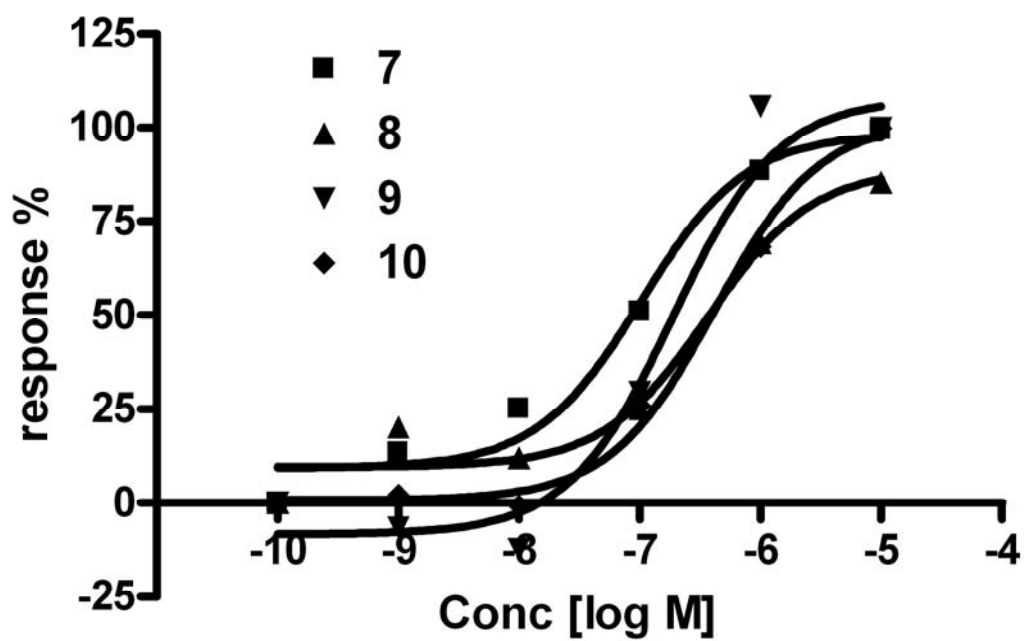

<sup>a</sup> 100% represents the maximal response to 1.

**Figure S2.** HPLC traces for analysis of nucleoside derivatives **7 – 10** (refer to main text for conditions)

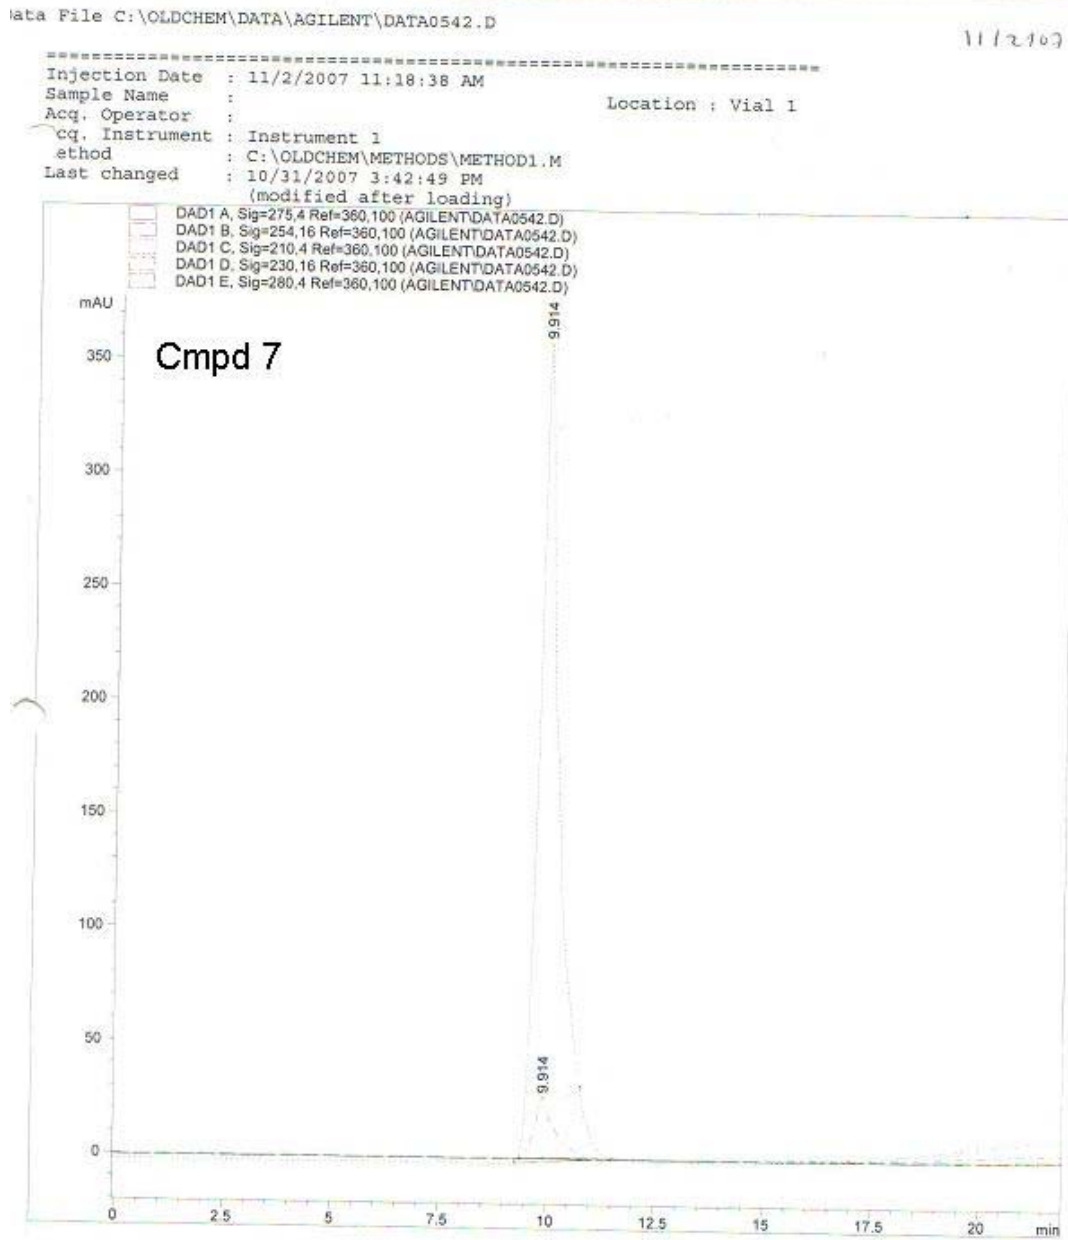



=====  
Injection Date : 11/2/2007 12:55:01 PM  
Sample Name : Location : Vial 1  
Acq. Operator :  
Acq. Instrument : Instrument 1  
Method : C:\OLDCHEM\METHODS\METHOD1.M  
Last changed : 10/31/2007 3:42:49 PM  
(modified after loading)

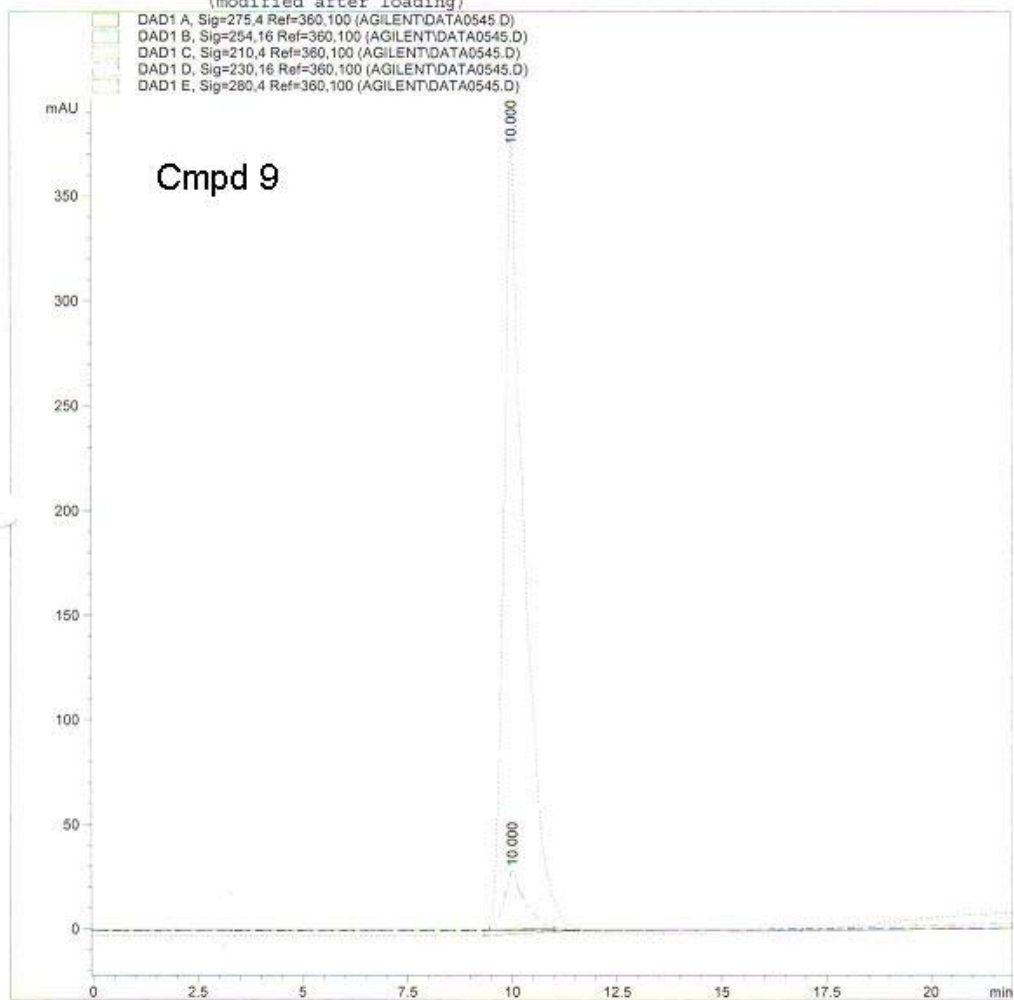



=====  
Injection Date : 11/2/2007 12:18:25 PM  
Sample Name : Location : Vial 1  
Acq. Operator :  
Acq. Instrument : Instrument 1  
Method : C:\OLDCHEM\METHODS\METHOD1.M  
Last changed : 10/31/2007 3:42:49 PM  
(modified after loading)

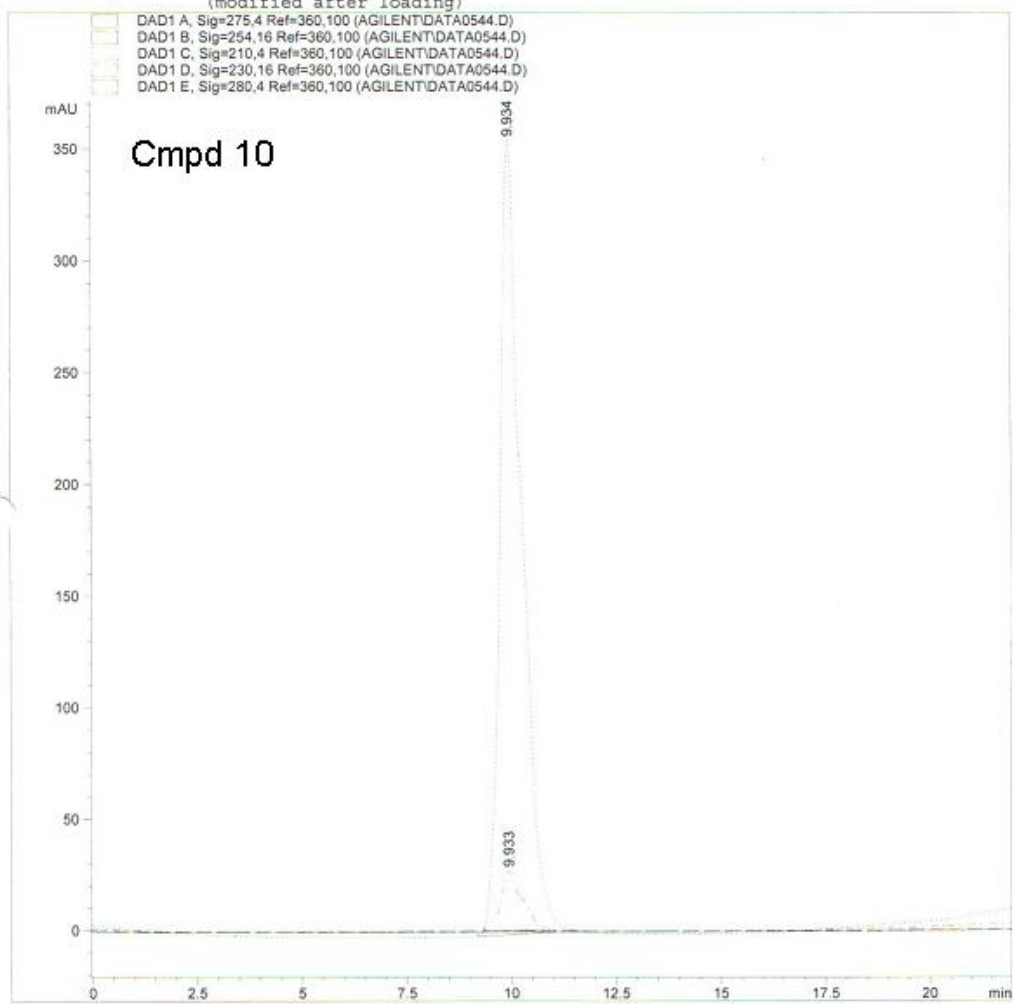

## References:

1. Hayamitsu, A., et al., *J. Med. Chem.*, **2007**, *50*, 1810-1827
2. de Zwart, M., et al., *Nucl. Nucl. Nucl. Acids*, **1998**, *17*, 969-985
3. Vittori S., et al., *Nucl. Nucl. Nucl. Acids*. **2004**, *23*, 471-481
4. Volpini R., et al., *J. Med. Chem.* **2002**, *45*, 3271-3279.
5. Baraldi P.G, et al., *J. Med. Chem.* **2007**, *50*, 374-308.
6. Baraldi P.G., et al., *Bioorg. Med. Chem.*, **2007**, *15*, 2514-2527
